# Supplementary material for: Dose and Schedule Determine Distinct Molecular Mechanisms Underlying the Efficacy of the p53–MDM2 Inhibitor HDM201
Source: Oxford University Press journal article supplement (doi:10.1158/0008-5472.can-18-0338), 2018-08-22
Supplement: 00085472can180338-sup-196416_2_supp_4861824_pb3756.xlsx [file 00085472can180338-sup-196416_2_supp_4861824_pb3756.xlsx]

## Sheet: A-QD Dosing HDM201 treatment
SampleName	Status	NumberReadsPB3	NumberReadsPB5	Lineage	Pathology	Aatf	Abca14	Abca4	Abcc3	Abcc4	Abhd17c	Abhd2	Abl2	Acap2	Acot7	Actr2	Adam22	Adamts13	Adamts14	Adarb1	Adk	Adssl1	Aff1	Aff3	Agfg1	Agmo	Ago2	Ahcyl2	Ahdc1	Ahi1	Ahnak	AI597468	Ak2	Akap13	Akap6	Akirin2	Amz1	Anapc16	Angptl2	Ank2	Ankdd1b	Ankhd1	Ankrd33b	Ankrd40	Ankrd6	Ankzf1	Anp32b	Anp32e	Anxa2
X25272-P0M1-P1M5-P2M19-DR-HDM201-QD	resistant	1304226	1138863	central_nervous_system	primitive_neuroectodermal_tumour-medulloblastoma	0	0	0	0	0	0	0	0	0	0	0	0	0	0	0	0	0	0	0	0	0	0	1060.76	0	707.176	0	0	0	0	0	0	0	0	0	0	0	0	0	0	0	0	0	0	0
X25272-P0M1-P1M5-P2M23-DR-HDM201-QD	resistant	2369475	2077181	central_nervous_system	primitive_neuroectodermal_tumour-medulloblastoma	418.375	0	0	0	0	0	0	0	0	0	0	0	0	1045.94	0	0	0	0	0	0	0	0	0	0	36398.7	0	0	0	0	0	0	0	0	0	0	0	0	0	0	0	0	1464.31	0	0
X25272-P0M1-P1M5-P2M6-DR-HDM201-QD	resistant	2904598	2125180	central_nervous_system	primitive_neuroectodermal_tumour-medulloblastoma	0	63547.8	0	0	0	0	0	0	0	0	0	0	0	0	0	2888.53	0	0	0	0	0	0	25209	0	22057.9	0	0	0	1050.38	0	0	0	0	0	787.782	0	0	0	0	0	0	0	787.782	0
X25286-P0M1-P1M2-P2M11-DR-HDM201-QD	resistant	3766592	3076955	central_nervous_system	primitive_neuroectodermal_tumour-medulloblastoma	0	0	0	0	0	0	0	0	0	0	0	0	0	0	0	0	0	0	0	0	0	0	0	918.234	0	0	0	0	0	1606.91	0	0	0	0	0	0	82870.6	0	0	0	0	0	0	0
X25286-P0M1-P1M2-P2M17-DR-HDM201-QD	resistant	218377	138418	central_nervous_system	primitive_neuroectodermal_tumour-medulloblastoma	0	0	0	0	0	0	0	0	0	0	0	0	0	0	0	0	0	0	0	0	0	0	0	0	0	0	0	0	0	0	0	0	0	0	4910.71	0	19642.8	0	0	0	0	0	0	0
X25286-P0M1-P1M2-P2M18-DR-HDM201-QD	resistant	893415	831270	central_nervous_system	primitive_neuroectodermal_tumour-medulloblastoma	0	0	0	0	0	0	0	0	0	0	0	0	0	0	0	21277.7	0	0	0	0	0	0	0	0	0	0	0	0	0	0	0	0	0	0	0	0	125639	0	0	0	0	0	0	0
X25286-P0M1-P1M2-P2M19-DR-HDM201-QD	resistant	1905868	1847982	central_nervous_system	primitive_neuroectodermal_tumour-medulloblastoma	0	0	0	0	0	0	0	0	0	0	0	0	0	0	0	0	0	0	0	0	0	767.118	0	9972.53	0	0	0	0	0	0	0	0	0	0	0	0	93588.4	0	0	0	0	0	0	0
X25286-P0M1-P1M2-P2M24-DR-HDM201-QD	resistant	5427698	5047634	central_nervous_system	primitive_neuroectodermal_tumour-medulloblastoma	10619	0	0	0	0	0	0	307.798	0	0	0	21084.1	0	0	0	0	0	0	7079.35	0	0	0	0	0	0	0	0	0	615.595	2000.69	0	0	0	6925.45	307.798	0	48785.9	461.697	0	0	0	923.393	0	0
X25286-P0M1-P1M2-P2M2-DR-HDM201-QD	resistant	1796082	1209826	central_nervous_system	primitive_neuroectodermal_tumour-medulloblastoma	0	0	0	0	0	0	0	0	0	0	0	0	0	0	0	0	0	0	0	0	0	0	0	0	0	0	0	0	0	4097.84	0	0	0	0	0	0	87810.9	0	0	0	0	0	0	0
X25286-P0M1-P1M2-P2M3-DR-HDM201-QD	resistant	2332721	2633736	central_nervous_system	primitive_neuroectodermal_tumour-medulloblastoma	0	0	0	0	0	0	0	0	0	0	0	0	0	0	0	0	0	0	0	0	0	0	0	0	0	0	0	0	0	0	0	0	0	0	15211.5	0	129643	0	0	0	0	0	0	0
X25286-P0M1-P1M2-P2M6-DR-HDM201-QD	resistant	5696678	4712367	central_nervous_system	primitive_neuroectodermal_tumour-medulloblastoma	0	0	0	22598.8	0	0	0	0	0	0	0	0	0	418.497	0	0	0	0	0	0	0	0	0	2720.23	0	0	0	0	0	0	0	0	0	6486.7	0	0	97091.3	0	0	0	0	0	0	0
X25459-P0M1-P1M2-P2M13-DR-HDM201-QD	resistant	1356819	1412251	central_nervous_system	primitive_neuroectodermal_tumour-medulloblastoma	0	0	0	0	0	0	0	0	0	4516.21	0	0	0	0	0	0	0	0	3225.87	0	0	0	0	0	0	0	0	0	0	20000.4	0	3225.87	0	0	0	0	0	0	0	0	0	0	0	0
X25459-P0M1-P1M2-P2M16-DR-HDM201-QD	resistant	1680981	2139381	central_nervous_system	primitive_neuroectodermal_tumour-medulloblastoma	0	0	0	0	0	0	0	0	0	5855.01	0	0	1756.5	0	0	2927.51	0	0	9953.52	0	0	0	0	0	0	0	0	0	0	28689.6	0	0	0	0	0	0	0	0	0	0	0	0	0	0
X25459-P0M1-P1M2-P2M25-DR-HDM201-QD	resistant	2241231	5916144	central_nervous_system	primitive_neuroectodermal_tumour-medulloblastoma	0	0	0	0	0	0	0	0	0	2909.2	0	0	0	0	0	0	0	0	6649.6	0	0	0	0	0	0	0	0	0	0	17455.2	0	6234	0	0	0	0	0	0	0	0	0	0	0	0
X25459-P0M1-P1M2-P2M6-DR-HDM201-QD	resistant	2971865	3375931	central_nervous_system	primitive_neuroectodermal_tumour-medulloblastoma	0	0	0	0	0	0	0	0	0	3122.3	0	0	1135.38	0	0	0	0	0	9366.91	0	0	0	0	0	0	0	0	0	0	22140	0	5109.22	0	0	0	1419.23	0	0	0	0	0	0	0	0
X25540-P0M1-P1M1-P2M15-DR-HDM201-QD	resistant	3819167	2515723	haematopoietic_and_lymphoid_tissue	lymphoid_neoplasm	0	0	0	0	1342.53	0	0	298.34	20734.6	0	0	0	0	0	0	0	0	0	0	447.509	2088.38	0	0	0	0	0	72198.2	0	0	0	0	0	0	0	0	0	0	0	0	596.679	0	0	0	0
X25540-P0M1-P1M1-P2M1-DR-HDM201-QD	resistant	3727037	3558252	haematopoietic_and_lymphoid_tissue	lymphoid_neoplasm	0	0	0	0	515.505	0	0	0	0	0	0	0	0	0	687.339	0	0	0	0	0	1718.35	0	0	0	0	0	3780.37	0	0	343.67	0	0	0	0	0	0	0	0	0	0	0	2749.36	0	687.339
X25540-P0M1-P1M1-P2M2-DR-HDM201-QD	resistant	6209999	5116899	haematopoietic_and_lymphoid_tissue	lymphoid_neoplasm	0	0	216.103	0	53917.7	0	0	16315.8	0	0	0	432.206	0	0	0	0	0	0	0	216.103	6483.09	0	540.257	0	324.154	0	864.411	0	756.36	0	0	0	0	0	216.103	0	0	0	0	0	0	0	0	0
X25540-P0M1-P1M1-P2M5-DR-HDM201-QD	resistant	4878454	4139695	haematopoietic_and_lymphoid_tissue	lymphoid_neoplasm	0	0	0	0	7232.94	0	0	0	0	0	0	0	0	0	0	667.656	0	0	9124.63	222.552	62537.1	0	0	0	222.552	0	1669.14	0	11127.6	556.38	0	0	11684	0	0	0	0	0	0	23034.1	0	0	0	0
X25540-P0M1-P1M1-P2M7-DR-HDM201-QD	resistant	4680013	3424403	haematopoietic_and_lymphoid_tissue	lymphoid_neoplasm	0	0	0	0	616.465	0	0	0	0	0	0	0	0	0	0	2619.97	0	0	0	0	0	0	308.232	0	0	0	1849.39	0	308.232	308.232	0	0	0	0	0	0	0	0	0	0	0	0	0	0
X25540-P0M1-P1M1-P2M9-DR-HDM201-QD	resistant	5627830	3922355	haematopoietic_and_lymphoid_tissue	lymphoid_neoplasm	0	0	0	0	1115.86	0	0	0	0	0	0	0	0	0	0	0	0	0	0	0	2975.63	0	0	0	0	0	1859.77	0	371.954	0	0	0	0	0	0	0	0	0	0	929.885	0	0	0	0
X25540-P0M1-P1M4-P2M3-DR-HDM201-QD	resistant	4676666	3067236	haematopoietic_and_lymphoid_tissue	lymphoid_neoplasm	0	0	0	0	0	0	0	0	0	0	0	0	0	0	0	0	0	0	1259.35	0	0	0	0	0	0	0	3022.45	0	27957.6	0	0	0	0	0	0	0	0	0	0	0	0	0	0	0
X25625-P0M1-P1M3-P2M20-DR-HDM201-QD	resistant	6601222	8245369	central_nervous_system	primitive_neuroectodermal_tumour-medulloblastoma	0	0	0	0	806.494	0	35687.3	0	0	0	0	0	0	0	0	0	0	6048.7	0	0	0	3830.85	0	0	0	0	0	48188	0	0	0	0	0	0	0	23589.9	0	0	0	0	0	0	0	0
X25625-P0M1-P1M3-P2M2-DR-HDM201-QD	resistant	3257277	8496382	central_nervous_system	primitive_neuroectodermal_tumour-medulloblastoma	0	0	0	0	0	0	28838	0	0	686.619	0	0	0	0	0	0	0	3776.4	0	0	0	4463.02	0	0	0	0	0	47033.4	0	0	0	0	0	0	0	0	0	0	0	0	0	0	0	0
X25625-P0M1-P1M3-P2M3-DR-HDM201-QD	resistant	7744391	10968306	central_nervous_system	primitive_neuroectodermal_tumour-medulloblastoma	0	0	0	0	0	0	36064	0	0	0	0	0	0	0	0	0	0	3811.64	879.61	0	0	2932.03	0	0	0	0	0	52776.6	0	0	0	0	0	0	0	0	0	0	0	0	0	5570.86	0	0
X25665-P0M1-P1M2-P2M14-P3M12-DR-HDM201-QD	resistant	3130548	2792707	haematopoietic_and_lymphoid_tissue	lymphoid_neoplasm	0	0	0	0	477.023	0	0	0	0	0	0	0	0	0	0	0	0	0	0	0	0	715.535	0	0	0	477.023	0	0	0	0	0	0	0	0	0	0	0	0	0	0	0	0	715.535	0
X25665-P0M1-P1M2-P2M14-P3M13-DR-HDM201-QD	resistant	2896932	3763195	haematopoietic_and_lymphoid_tissue	lymphoid_neoplasm	0	0	0	0	0	0	0	0	0	0	0	0	0	0	409.249	0	0	0	0	1227.75	0	0	0	0	0	0	0	0	0	0	0	0	0	0	0	0	0	0	0	0	0	19030.1	4910.98	0
X25665-P0M1-P1M2-P2M14-P3M1-DR-HDM201-QD	resistant	1092242	906506	haematopoietic_and_lymphoid_tissue	lymphoid_neoplasm	0	0	0	0	0	0	0	0	0	0	0	0	0	0	0	0	0	0	0	2868.6	0	0	0	0	0	0	0	0	0	0	0	0	0	0	0	0	0	0	0	0	0	0	0	0
X25665-P0M1-P1M2-P2M14-P3M5-DR-HDM201-QD	resistant	1923149	2618885	haematopoietic_and_lymphoid_tissue	lymphoid_neoplasm	0	0	0	0	0	12535.2	0	0	0	0	0	0	0	0	0	0	0	0	22284.7	0	0	0	928.531	0	0	464.265	0	0	0	0	0	0	0	0	0	0	0	0	0	0	0	0	464.265	0
X25665-P0M1-P1M2-P2M14-P3M7-DR-HDM201-QD	resistant	3707924	5099638	haematopoietic_and_lymphoid_tissue	lymphoid_neoplasm	0	0	0	0	0	0	0	0	0	0	0	0	0	0	28881.6	0	0	0	0	0	0	0	0	0	0	0	0	0	0	0	0	0	0	0	0	0	1756.31	0	0	0	0	0	5854.38	0
X25665-P0M1-P1M2-P2M14-P3M8-DR-HDM201-QD	resistant	3477533	1270714	haematopoietic_and_lymphoid_tissue	lymphoid_neoplasm	0	0	0	0	420.034	0	0	0	0	0	0	0	0	0	0	0	0	420.034	0	0	0	0	420.034	0	0	630.051	0	0	0	0	23941.9	0	0	0	0	0	18481.5	0	0	0	0	840.068	1260.1	0
X25665-P0M1-P1M2-P2M14-P3M9-DR-HDM201-QD	resistant	1229253	2243172	haematopoietic_and_lymphoid_tissue	lymphoid_neoplasm	0	0	0	0	0	0	0	0	0	0	0	0	0	0	0	0	0	0	0	2183.69	0	0	0	0	0	0	0	0	0	0	0	0	0	0	0	0	2729.62	0	0	0	0	0	26750.2	0
X25665-P0M1-P1M2-P2M19-P3M3-DR-HDM201-QD	resistant	3142844	3403277	haematopoietic_and_lymphoid_tissue	lymphoid_neoplasm	0	478.258	0	0	0	0	0	0	0	0	0	0	0	0	0	92303.9	0	0	0	69347.5	0	0	0	0	0	0	0	0	478.258	956.517	478.258	0	0	0	0	0	0	0	0	0	0	0	1673.9	0
X25665-P0M1-P1M2-P2M19-P3M4-DR-HDM201-QD	resistant	2029788	2231061	haematopoietic_and_lymphoid_tissue	lymphoid_neoplasm	0	0	0	0	0	0	0	0	0	0	0	0	0	0	0	0	0	0	0	705.791	0	0	0	0	0	0	0	0	0	0	0	0	0	0	0	0	0	0	0	0	0	0	705.791	0
X25272-P0M1-P1M5-P2M10-VEH-QD	untreated	5226183	3462568	central_nervous_system	primitive_neuroectodermal_tumour-medulloblastoma	0	0	0	0	15394.8	2782.19	0	0	0	0	0	0	0	0	0	0	0	0	1112.87	2225.75	1298.35	0	0	0	20031.7	1483.83	1112.87	0	1298.35	927.395	0	0	0	0	0	0	0	0	0	0	0	0	0	0
X25272-P0M1-P1M5-P2M13-VEH-QD	untreated	2375200	2588321	central_nervous_system	primitive_neuroectodermal_tumour-medulloblastoma	0	0	0	0	788.055	0	0	0	0	0	0	0	0	0	0	0	0	394.028	0	0	985.069	0	2364.17	0	8077.56	0	591.041	0	7092.5	0	0	0	0	0	0	0	0	0	0	0	0	591.041	0	591.041
X25272-P0M1-P1M5-P2M15-VEH-QD	untreated	1258534	1077793	central_nervous_system	primitive_neuroectodermal_tumour-medulloblastoma	1577.58	0	0	0	0	0	0	1971.97	0	0	0	0	0	0	0	0	0	0	0	0	0	788.788	0	0	0	1577.58	11831.8	0	1577.58	0	0	0	3155.15	0	0	0	0	0	0	0	0	4732.73	0	0
X25272-P0M1-P1M5-P2M22-VEH-QD	untreated	760908	373240	central_nervous_system	primitive_neuroectodermal_tumour-medulloblastoma	0	0	0	0	0	0	0	0	0	0	0	0	0	0	0	0	0	0	0	0	0	0	0	0	0	0	0	0	0	0	0	0	0	0	0	0	0	0	0	0	0	0	2493.17	0
X25272-P0M1-P1M5-P2M24-VEH-QD	untreated	1814414	698651	central_nervous_system	primitive_neuroectodermal_tumour-medulloblastoma	0	0	0	0	0	0	0	0	0	2172.64	0	0	0	0	0	0	0	482.81	1689.83	0	0	2655.45	0	0	3621.07	0	0	0	4586.69	0	0	0	0	0	482.81	0	0	0	0	0	0	0	1207.02	0
X25272-P0M1-P1M5-P2M25-VEH-QD	untreated	1796551	1830535	central_nervous_system	primitive_neuroectodermal_tumour-medulloblastoma	0	0	0	0	2519.18	0	0	0	0	0	0	0	0	0	0	1679.45	0	14275.3	419.863	0	0	0	0	0	0	0	419.863	0	0	0	0	0	0	0	0	0	0	0	0	0	0	0	0	0
X25272-P0M1-P1M5-P2M5-VEH-QD	untreated	2825367	3603145	central_nervous_system	primitive_neuroectodermal_tumour-medulloblastoma	0	0	0	0	917.1	0	0	0	0	0	0	0	0	0	0	0	0	0	550.26	0	0	0	0	0	6603.12	1100.52	0	0	1467.36	0	0	0	0	0	0	0	0	0	0	0	0	0	733.68	0
X25286-P0M1-P1M2-P2M13-VEH-QD	untreated	3816053	3521559	central_nervous_system	primitive_neuroectodermal_tumour-medulloblastoma	0	0	0	0	0	0	0	0	0	0	0	0	0	0	0	0	0	0	1176.23	0	0	0	0	0	0	0	0	0	0	0	0	0	0	0	0	0	115662	0	0	0	0	0	0	0
X25286-P0M1-P1M2-P2M16-VEH-QD	untreated	3078064	2544325	central_nervous_system	primitive_neuroectodermal_tumour-medulloblastoma	0	0	0	0	0	0	0	0	0	0	0	0	0	0	0	0	0	0	0	0	0	0	0	893.354	0	0	0	0	0	0	0	0	0	0	893.354	0	111669	0	0	0	0	0	0	0
X25286-P0M1-P1M2-P2M1-VEH-QD	untreated	2481718	2771593	central_nervous_system	primitive_neuroectodermal_tumour-medulloblastoma	0	0	0	0	0	0	0	0	0	0	0	0	0	132976	0	2821.78	0	0	0	0	0	705.445	0	0	0	0	0	0	0	0	0	0	0	0	1058.17	0	63842.8	0	0	0	0	0	0	0
X25286-P0M1-P1M2-P2M20-VEH-QD	untreated	4004189	3253796	central_nervous_system	primitive_neuroectodermal_tumour-medulloblastoma	0	0	0	0	0	0	0	0	0	0	0	0	0	0	0	10697.1	0	0	486.231	0	972.463	0	0	18233.7	0	486.231	0	0	0	0	0	0	0	729.347	0	0	102352	18963	0	0	0	0	0	0
X25286-P0M1-P1M2-P2M21-VEH-QD	untreated	5995378	4520390	central_nervous_system	primitive_neuroectodermal_tumour-medulloblastoma	0	0	0	0	4429.15	0	0	553.643	0	0	0	0	0	0	0	0	0	0	0	0	0	0	0	56840.7	0	0	0	0	0	0	0	0	0	0	1476.38	0	82308.3	922.739	0	0	0	0	0	0
X25286-P0M1-P1M2-P2M22-VEH-QD	untreated	2776286	3543736	central_nervous_system	primitive_neuroectodermal_tumour-medulloblastoma	7384.94	0	0	0	0	0	0	0	0	0	0	0	0	0	0	0	0	0	5274.95	0	0	0	0	3428.72	0	0	0	0	0	1054.99	0	0	0	527.495	29539.7	0	116840	0	0	0	0	0	1846.23	0
X25286-P0M1-P1M2-P2M23-VEH-QD	untreated	3965879	3152812	central_nervous_system	primitive_neuroectodermal_tumour-medulloblastoma	0	0	0	0	0	0	0	0	0	0	0	0	0	570.298	0	570.298	0	0	0	0	0	0	0	855.447	0	0	0	0	0	2566.34	0	0	0	0	0	0	124325	0	0	0	0	0	0	0
X25286-P0M1-P1M2-P2M25-VEH-QD	untreated	4430434	2485130	central_nervous_system	primitive_neuroectodermal_tumour-medulloblastoma	0	0	0	0	0	0	0	0	0	0	0	0	0	0	0	0	0	0	0	0	3483.56	0	0	53248.7	0	0	0	0	0	0	0	0	0	0	0	0	96544.4	0	0	0	0	0	0	0
X25286-P0M1-P1M2-P2M5-VEH-QD	untreated	1168927	1203078	central_nervous_system	primitive_neuroectodermal_tumour-medulloblastoma	0	0	0	0	0	0	0	0	0	0	0	0	0	0	0	0	0	0	0	0	0	0	0	0	0	0	0	0	0	0	0	0	0	0	18919.2	0	136113	0	0	0	0	0	0	0
X25286-P0M1-P1M2-P2M9-VEH-QD	untreated	3117070	2259631	central_nervous_system	primitive_neuroectodermal_tumour-medulloblastoma	0	0	0	0	0	0	0	0	0	0	0	0	0	0	0	0	0	0	0	0	0	0	0	705.86	0	0	0	0	0	0	0	0	0	0	57880.5	0	145054	0	0	0	0	0	0	0
X25459-P0M1-P1M2-P2M10-VEH-QD	untreated	10955738	9582608	central_nervous_system	primitive_neuroectodermal_tumour-medulloblastoma	0	0	33198.2	0	0	0	0	737.737	0	0	41682.2	0	0	1475.47	0	0	0	0	0	0	0	0	0	0	0	0	0	0	0	737.737	0	0	0	0	0	0	0	0	0	0	0	0	0	0
X25459-P0M1-P1M2-P2M12-VEH-QD	untreated	8440953	9665866	central_nervous_system	primitive_neuroectodermal_tumour-medulloblastoma	0	0	69679.3	0	0	0	0	0	0	0	83006	0	761.523	1523.05	0	0	0	0	0	0	0	0	0	0	0	0	0	0	0	1142.28	0	0	0	0	0	0	0	0	0	0	0	0	0	0
X25459-P0M1-P1M2-P2M1-VEH-QD	untreated	10177552	9218976	central_nervous_system	primitive_neuroectodermal_tumour-medulloblastoma	0	0	34419.3	0	0	0	0	0	0	0	43127.8	9537.88	0	1658.76	0	1244.07	0	0	0	0	0	0	0	0	0	0	0	0	0	1244.07	0	0	0	0	0	0	0	0	0	0	0	0	0	0
X25459-P0M1-P1M2-P2M20-VEH-QD	untreated	6564367	7479709	central_nervous_system	primitive_neuroectodermal_tumour-medulloblastoma	0	0	23035.5	0	0	0	0	940.225	0	0	28676.9	0	0	1880.45	0	0	0	0	0	0	0	0	0	0	0	0	0	0	0	1880.45	0	0	0	0	0	0	940.225	0	0	0	0	0	0	0
X25459-P0M1-P1M2-P2M21-VEH-QD	untreated	13736828	21291778	central_nervous_system	primitive_neuroectodermal_tumour-medulloblastoma	0	0	26383.5	0	0	0	0	0	0	659.587	37926.2	0	0	2968.14	0	659.587	0	0	1648.97	0	659.587	0	0	0	0	0	0	0	0	5606.49	0	0	0	0	0	0	0	0	0	0	0	0	0	0
X25459-P0M1-P1M2-P2M23-VEH-QD	untreated	10679686	8743063	central_nervous_system	primitive_neuroectodermal_tumour-medulloblastoma	0	0	38697.5	0	0	0	0	0	0	0	38697.5	1045.88	0	52293.9	0	0	0	0	0	0	0	0	0	0	0	0	0	0	0	0	0	0	0	0	0	0	0	0	0	0	0	2091.76	0	0
X25459-P0M1-P1M2-P2M3-VEH-QD	untreated	11924955	16465635	central_nervous_system	primitive_neuroectodermal_tumour-medulloblastoma	2830.37	0	35733.4	0	0	0	0	0	0	0	43163.2	0	0	1768.98	0	6014.54	0	0	0	0	0	0	0	0	0	0	0	0	0	1061.39	0	0	0	0	0	0	0	0	0	0	0	0	0	0
X25459-P0M1-P1M2-P2M4-VEH-QD	untreated	4393924	4465148	central_nervous_system	primitive_neuroectodermal_tumour-medulloblastoma	0	0	20965.7	0	0	0	0	0	0	0	26590.6	0	0	0	0	0	0	0	0	0	0	0	0	0	0	0	0	0	0	0	0	0	0	0	0	0	0	0	0	0	0	0	0	0
X25459-P0M1-P1M2-P2M5-VEH-QD	untreated	2410480	2511903	central_nervous_system	primitive_neuroectodermal_tumour-medulloblastoma	0	0	0	0	0	0	26504.1	0	0	6626.01	0	0	0	0	0	27523.4	0	8155.09	8664.79	0	0	3567.85	0	1019.39	1019.39	0	0	33639.8	0	30071.9	0	2038.77	0	0	0	0	0	0	0	0	0	0	0	0
X25459-P0M1-P1M2-P2M9-VEH-QD	untreated	2651314	2710382	central_nervous_system	primitive_neuroectodermal_tumour-medulloblastoma	0	0	0	0	0	0	0	0	0	3869.55	0	0	0	0	0	0	0	0	5527.94	0	0	0	0	0	0	0	0	0	0	28745.3	0	0	0	0	0	0	0	0	0	0	0	0	0	0
X25540-P0M1-P1M1-P2M11-VEH-QD	untreated	2951230	3476663	haematopoietic_and_lymphoid_tissue	lymphoid_neoplasm	0	0	0	0	4407.92	0	0	0	0	0	0	0	0	0	0	0	0	0	440.792	0	0	0	0	0	0	0	93741.7	0	4114.06	734.653	0	0	0	0	0	0	0	0	0	1028.51	0	0	293.861	0
X25540-P0M1-P1M1-P2M3-VEH-QD	untreated	5850710	5097823	haematopoietic_and_lymphoid_tissue	lymphoid_neoplasm	0	0	0	0	19594.7	0	0	0	0	0	0	0	0	9317.77	0	0	45081.6	0	1370.26	2740.52	0	0	0	0	0	0	34256.5	0	1096.21	0	0	0	0	0	274.052	0	0	0	0	0	0	0	0	411.078
X25540-P0M1-P1M1-P2M4-VEH-QD	untreated	3537978	2933910	haematopoietic_and_lymphoid_tissue	lymphoid_neoplasm	0	0	0	0	1077.53	0	0	0	0	0	0	0	0	1795.88	0	359.177	0	0	5208.06	0	15624.2	1077.53	7183.53	538.765	0	0	40048.2	359.177	3591.77	0	0	0	0	0	359.177	0	538.765	0	0	0	0	0	0	718.353
X25540-P0M1-P1M1-P2M8-VEH-QD	untreated	5897590	6330468	haematopoietic_and_lymphoid_tissue	lymphoid_neoplasm	0	0	0	0	1510.43	0	0	0	0	0	0	0	0	0	0	0	0	503.477	0	251.739	37383.2	377.608	1510.43	0	0	5664.12	38012.5	0	6041.73	0	0	0	0	0	0	0	0	0	0	0	0	0	0	11831.7
X25540-P0M1-P1M4-P2M1-VEH-QD	untreated	7644435	7502161	haematopoietic_and_lymphoid_tissue	lymphoid_neoplasm	0	0	0	0	0	0	0	0	0	0	0	0	0	0	0	241.542	0	0	0	0	603.856	0	0	0	3019.28	0	80312.9	0	1690.8	1207.71	0	0	966.17	241.542	724.627	0	0	0	0	966.17	7729.36	0	0	0
X25540-P0M1-P1M4-P2M2-VEH-QD	untreated	1241349	2298088	haematopoietic_and_lymphoid_tissue	lymphoid_neoplasm	0	0	0	0	960.406	0	0	0	0	0	0	0	0	0	0	0	0	0	0	0	0	0	0	0	4081.73	0	9123.86	0	0	0	0	0	0	0	0	0	0	0	0	0	0	0	720.304	0
X25540-P0M1-P1M4-P2M5-VEH-QD	untreated	1541387	4145429	haematopoietic_and_lymphoid_tissue	lymphoid_neoplasm	0	0	0	0	0	0	3861.93	0	0	0	0	1679.1	0	0	335.82	0	8395.49	0	2014.92	671.639	503.73	0	0	0	0	335.82	111660	0	1511.19	0	0	0	0	0	0	0	0	0	0	0	4365.66	1175.37	0	0
X25625-P0M1-P1M3-P2M11-VEH-QD	untreated	3411480	4196434	central_nervous_system	primitive_neuroectodermal_tumour-medulloblastoma	0	0	0	0	0	0	0	0	0	4205.9	0	0	0	0	0	0	0	0	5958.36	0	0	0	0	0	0	0	0	0	0	21380	0	2102.95	0	0	0	0	0	0	32245.2	0	0	0	0	0
X25625-P0M1-P1M3-P2M12-VEH-QD	untreated	1533896	2702500	central_nervous_system	primitive_neuroectodermal_tumour-medulloblastoma	0	0	0	0	0	0	0	0	0	2002.89	0	36052.1	0	0	0	0	0	0	187070	0	0	0	0	0	0	0	0	0	0	8812.73	0	1201.74	0	0	0	0	0	0	0	0	0	0	0	0
X25625-P0M1-P1M3-P2M13-VEH-QD	untreated	2079213	4183432	central_nervous_system	primitive_neuroectodermal_tumour-medulloblastoma	0	0	0	0	0	0	0	0	0	1153.01	0	0	0	0	0	0	0	0	4612.04	0	0	0	0	0	0	0	0	0	0	9224.08	0	239250	0	0	0	0	1153.01	0	0	0	0	0	0	0
X25625-P0M1-P1M3-P2M14-VEH-QD	untreated	2387017	3611172	central_nervous_system	primitive_neuroectodermal_tumour-medulloblastoma	0	0	0	0	0	0	0	0	0	3767.79	0	0	0	0	0	0	0	0	6279.64	0	0	0	0	0	0	0	0	0	0	29514.3	0	6279.64	0	0	0	0	0	0	0	0	0	0	0	0
X25625-P0M1-P1M3-P2M18-VEH-QD	untreated	5934919	7336184	central_nervous_system	primitive_neuroectodermal_tumour-medulloblastoma	0	0	0	0	0	0	15189.6	0	0	3089.42	0	0	32953.8	0	0	0	0	0	6178.83	0	0	0	0	0	0	0	0	16991.8	0	113536	0	3089.42	0	0	0	0	0	0	58184	0	0	0	0	0
X25625-P0M1-P1M3-P2M21-VEH-QD	untreated	1866525	2331034	central_nervous_system	primitive_neuroectodermal_tumour-medulloblastoma	0	0	0	0	0	0	18282.6	0	0	61703.8	0	0	0	0	0	0	0	0	2938.28	0	0	0	0	0	0	0	0	24812.1	0	179888	0	0	0	0	0	0	0	0	0	0	0	0	0	0
X25625-P0M1-P1M3-P2M23-VEH-QD	untreated	10038231	12207081	central_nervous_system	primitive_neuroectodermal_tumour-medulloblastoma	0	0	0	0	0	0	57019.8	0	0	2384.86	0	0	0	0	0	867.221	0	50082	1951.25	0	0	47914	0	0	0	0	0	66776	0	3902.49	0	0	0	0	0	867.221	0	0	0	0	0	0	0	0
X25625-P0M1-P1M3-P2M4-VEH-QD	untreated	3464488	3597435	central_nervous_system	primitive_neuroectodermal_tumour-medulloblastoma	0	0	0	0	0	0	54154.4	0	0	0	0	0	0	0	0	0	0	1463.63	975.756	0	0	2927.27	0	0	0	0	0	80987.7	0	0	0	0	0	0	0	0	0	0	0	0	0	0	0	0
X25625-P0M1-P1M3-P2M6-VEH-QD	untreated	5009284	7536964	central_nervous_system	primitive_neuroectodermal_tumour-medulloblastoma	0	0	0	0	0	0	26615.8	0	0	0	0	0	0	1706.14	0	0	0	2388.6	34122.8	0	0	2729.82	0	0	0	0	0	37193.8	0	0	0	0	0	0	0	1706.14	0	682.456	0	0	0	0	0	0
X25625-P0M1-P1M3-P2M8-VEH-QD	untreated	6915537	8274552	central_nervous_system	primitive_neuroectodermal_tumour-medulloblastoma	0	0	0	0	0	0	32970.3	0	0	0	0	0	0	0	0	0	0	5495.05	0	0	0	2747.52	0	0	0	0	0	50981.8	0	915.841	0	0	0	0	0	0	0	0	0	0	0	0	0	0
X25665-P0M1-P1M2-P2M14-P3M10-VEH-QD	untreated	417208	501624	haematopoietic_and_lymphoid_tissue	lymphoid_neoplasm	0	0	0	0	0	0	0	0	0	0	0	0	0	0	0	0	0	0	0	8656.06	0	0	0	0	0	0	0	0	0	0	0	0	0	0	0	0	0	0	0	0	0	5410.04	68166.5	0
X25665-P0M1-P1M2-P2M14-P3M14-VEH-QD	untreated	3155319	3222800	haematopoietic_and_lymphoid_tissue	lymphoid_neoplasm	0	0	0	0	0	0	0	0	0	0	0	0	0	0	0	0	0	0	671.139	20581.6	0	0	0	0	0	0	0	1342.28	447.426	0	447.426	0	0	0	0	0	0	0	0	0	0	10514.5	93064.6	0
X25665-P0M1-P1M2-P2M14-P3M2-VEH-QD	untreated	3660838	3870741	haematopoietic_and_lymphoid_tissue	lymphoid_neoplasm	0	0	0	0	1968.85	0	0	1181.31	787.538	0	0	0	0	0	0	0	0	0	1181.31	18704	590.654	787.538	0	0	590.654	0	0	0	0	0	0	0	0	0	0	0	0	0	0	0	0	4725.23	90763.8	0
X25665-P0M1-P1M2-P2M14-P3M3-VEH-QD	untreated	313474	280146	haematopoietic_and_lymphoid_tissue	lymphoid_neoplasm	0	0	0	0	0	0	0	0	0	0	0	0	0	0	0	3130.81	0	0	0	14088.7	0	0	0	0	0	0	0	0	0	0	0	0	0	0	0	0	0	0	0	0	0	18784.9	65747.1	0
X25665-P0M1-P1M2-P2M14-P3M4-VEH-QD	untreated	3047490	3558593	haematopoietic_and_lymphoid_tissue	lymphoid_neoplasm	0	0	0	0	618.157	0	0	0	0	0	0	412.105	0	0	618.157	0	0	0	0	20193.1	0	0	0	0	0	0	0	0	0	824.21	0	0	412.105	0	0	0	0	0	0	0	0	13805.5	80154.4	0
X25665-P0M1-P1M2-P2M14-P3M6-VEH-QD	untreated	3226478	2927895	haematopoietic_and_lymphoid_tissue	lymphoid_neoplasm	0	0	0	0	412.223	0	0	0	0	0	0	0	0	0	0	1236.67	0	412.223	0	20405	0	0	618.334	0	0	9687.23	0	412.223	1236.67	0	0	0	0	0	0	0	0	0	0	0	0	4946.67	81826.2	1030.56
X25665-P0M1-P1M2-P2M19-P3M5-VEH-QD	untreated	688655	1099874	haematopoietic_and_lymphoid_tissue	lymphoid_neoplasm	0	0	0	0	0	0	0	0	0	0	0	0	0	0	0	0	0	0	0	45628.2	0	0	0	0	0	0	0	0	0	0	0	0	0	0	0	0	0	0	0	0	0	0	0	0
X25665-P0M1-P1M2-P2M19-P3M7-VEH-QD	untreated	2998320	919192	haematopoietic_and_lymphoid_tissue	lymphoid_neoplasm	0	0	0	0	0	793.859	0	0	0	0	0	0	0	0	0	529.239	0	1058.48	0	36252.9	0	529.239	0	0	0	0	529.239	0	0	0	0	0	0	0	0	0	0	0	0	0	0	1587.72	12172.5	0
X25665-P0M1-P1M2-P2M19-P3M9-VEH-QD	untreated	1503322	1645384	haematopoietic_and_lymphoid_tissue	lymphoid_neoplasm	0	0	0	0	0	0	0	0	0	0	0	0	0	0	0	1360.44	0	0	0	33104.1	0	0	906.963	0	0	0	0	0	0	0	0	0	0	0	0	0	0	0	0	0	0	906.963	31743.7	0
[truncated: 972 more columns]

## Sheet: B-QD Dosing - genes
gene_name	Fold Change	PValue	FDR	AvgDiv	PercentSample	predicted_function
Trp53	247.137	1.3373e-101	4.07063e-98	30429.5	0.551724	GOF
Mdm4	46.9644	3.66168e-44	5.57307e-41	4760.49	0.183908	GOF
Trp63	14.3891	2.40646e-22	2.44175e-19	5334.21	0.206897	GOF
Itsn2	13.8971	1.64872e-20	1.00374e-17	3072.87	0.172414	GOF
Stag2	12.3458	1.74981e-21	1.33161e-18	3435.07	0.241379	GOF		FC>5 is listed
Ptpn4	11.2602	1.38003e-17	7.00135e-15	2505.57	0.16092	Uncertain
Spred1	10.3463	1.82791e-15	7.94878e-13	1231.01	0.0344828	GOF
Colq	10.268	9.39304e-14	3.17693e-11	2078.81	0.126437	LOF
Cul5	9.58457	6.88875e-15	2.62117e-12	1403.69	0.0344828	GOF
Ccnt2	8.18135	1.69509e-12	4.69077e-10	1736.64	0.149425	LOF
Mir764	7.08688	2.52794e-11	5.13004e-09	753.988	0.0229885	LOF
Zdhhc17	6.95718	8.31781e-11	1.58246e-08	785.85	0.091954	GOF
Nono	6.89642	4.86963e-13	1.48232e-10	947.533	0.16092	LOF
Smad2	6.54613	7.65517e-09	1.0592e-06	3007.94	0.114943	GOF
Zfx	6.45896	1.24058e-10	2.22136e-08	902.345	0.0344828	LOF
Gramd3	5.89904	1.29096e-08	1.63736e-06	3410.67	0.126437	LOF
Aurkb	5.76611	5.66924e-09	8.2177e-07	1857.22	0.126437	LOF
Atp5j2	5.62145	2.28627e-07	2.17482e-05	2782.91	0.103448	LOF
Runx1	5.54468	1.47822e-11	3.4613e-09	3513.35	0.218391	GOF
Pou3f2	5.5327	2.88318e-09	4.3882e-07	2180.76	0.114943	GOF
Atp6v0e	5.48289	1.47093e-08	1.791e-06	4481.44	0.183908	LOF
Stim1	5.32722	9.37008e-09	1.24011e-06	643.525	0.103448	GOF
Tpx2	5.07011	3.79543e-08	4.44358e-06	507.754	0.0344828	LOF
Rai2	5.04928	4.47837e-07	3.50202e-05	2950.94	0.126437	GOF

## Sheet: C-2QW Dosing HDM201 treatment
SampleName	Status	NumberReadsPB3	NumberReadsPB5	Lineage	Pathology	Aars2	Abcb11	Abcb1b	Abcb9	Abcc12	Abcc4	Abhd2	Abl1	Ablim1	Ablim2	Abracl	Acaca	Acap2	Acbd6	Acsf3	Acsl1	Actg2	Acvr2a	Adam12	Adam19	Adamts10	Adamts12	Adamts14	Adamts18	Adamtsl1	Adamtsl3	Adarb2	Adhfe1	Adk	Adtrp	Afap1	Aff3	Ahcyl1	Ahdc1	Ahi1	Ahnak	AI118078	AI197445	AI467606	AI597468	Ak1	Akap13	Akap6	Akirin2
X25272-P0M1-P1M4-DR-HDM201-2QW	resistant	8506614	9561634	central_nervous_system	primitive_neuroectodermal_tumour-medulloblastoma	0	0	0	3124.93	0	0	0	0	0	1339.26	0	1636.87	0	0	744.031	297.612	0	744.031	1041.64	0	0	20088.8	892.837	1190.45	1636.87	0	0	0	297.612	0	744.031	0	0	892.837	0	0	0	0	0	0	1041.64	0	7886.73	0
X25272-P0M1-P1M5-DR-HDM201-2QW	resistant	5915033	5040749	central_nervous_system	primitive_neuroectodermal_tumour-medulloblastoma	0	0	0	0	0	0	0	0	0	0	0	0	0	0	400.022	10600.6	0	0	0	0	0	1400.08	0	0	0	0	0	0	600.034	0	0	0	0	0	0	0	0	0	0	0	0	0	800.045	0
X25272-P0M1-P1M6-DR-HDM201-2QW	resistant	6194833	3858042	central_nervous_system	primitive_neuroectodermal_tumour-medulloblastoma	0	0	0	0	0	0	0	0	0	4789.32	0	0	1741.57	0	0	0	0	0	0	0	0	0	0	0	0	0	870.785	0	0	0	0	0	0	0	0	0	0	0	0	0	0	0	2176.96	0
X25272-P0M1-P1M7-DR-HDM201-2QW	resistant	4373559	3309336	central_nervous_system	primitive_neuroectodermal_tumour-medulloblastoma	0	0	0	4488.97	0	0	0	0	0	0	0	0	0	0	0	0	0	0	0	0	0	0	0	0	792.171	0	0	0	0	0	0	0	0	0	0	0	0	0	0	0	17955.9	0	17163.7	0
X25272-P0M1-P1M8-DR-HDM201-2QW	resistant	5699805	7127233	central_nervous_system	primitive_neuroectodermal_tumour-medulloblastoma	0	0	0	0	0	0	0	0	0	0	0	0	0	0	0	0	0	0	0	0	0	0	0	0	0	0	0	0	993.108	0	0	0	0	1737.94	0	2234.49	0	0	0	0	0	0	0	0
X25272-P0M1-P1M9-DR-HDM201-2QW	resistant	5998418	6979292	central_nervous_system	primitive_neuroectodermal_tumour-medulloblastoma	0	0	0	0	0	0	0	0	623.795	0	0	415.864	0	0	0	0	0	0	0	0	0	0	0	23288.4	0	0	0	0	0	0	0	0	0	133908	0	0	0	0	0	0	0	0	15802.8	0
X25286-P0M1-P1M10-DR-HDM201-2QW	resistant	4821808	4948887	central_nervous_system	primitive_neuroectodermal_tumour-medulloblastoma	0	0	0	0	0	290.93	0	0	1163.72	290.93	0	290.93	0	581.86	872.79	1163.72	0	0	45966.9	0	0	290.93	0	0	727.325	0	436.395	0	0	0	290.93	1309.18	0	290.93	0	0	0	0	0	0	0	290.93	727.325	0
X25286-P0M1-P1M4-DR-HDM201-2QW	resistant	4679501	6820002	central_nervous_system	primitive_neuroectodermal_tumour-medulloblastoma	0	329.929	0	329.929	0	0	0	0	494.894	0	0	0	0	824.823	329.929	0	0	0	2969.36	0	0	0	659.858	0	659.858	0	0	0	1649.65	494.894	0	0	0	0	0	0	0	0	0	0	0	659.858	494.894	2639.43
X25286-P0M1-P1M5-DR-HDM201-2QW	resistant	6190669	7862353	central_nervous_system	primitive_neuroectodermal_tumour-medulloblastoma	1592.81	0	0	0	0	0	0	0	0	187.39	0	0	0	0	1218.03	0	187.39	0	1967.59	0	0	468.474	562.169	0	936.948	187.39	0	0	2248.67	0	0	1967.59	0	936.948	0	281.084	0	0	0	0	0	0	374.779	0
X25286-P0M1-P1M6-DR-HDM201-2QW	resistant	6622818	8309398	central_nervous_system	primitive_neuroectodermal_tumour-medulloblastoma	0	0	0	0	0	0	27139.2	0	1073.3	613.316	0	0	0	0	306.658	0	0	0	0	0	0	0	0	0	1686.62	0	0	0	613.316	50445.2	0	306.658	0	1379.96	613.316	0	0	0	0	0	0	306.658	766.644	0
X25286-P0M1-P1M7-DR-HDM201-2QW	resistant	4656497	7190488	central_nervous_system	primitive_neuroectodermal_tumour-medulloblastoma	0	1395.63	0	0	0	0	0	0	26982.2	0	0	26633.3	0	0	0	0	232.605	0	814.117	0	0	232.605	0	0	1046.72	0	465.21	0	4652.1	0	0	697.815	0	30820.1	1395.63	0	0	0	0	0	0	0	232.605	0
X25286-P0M1-P1M8-DR-HDM201-2QW	resistant	6187939	6015643	central_nervous_system	primitive_neuroectodermal_tumour-medulloblastoma	0	0	0	956.758	0	0	0	1722.16	4783.79	0	0	0	0	382.703	765.406	0	5166.49	0	3827.03	0	0	0	1339.46	0	2487.57	0	0	0	765.406	2487.57	0	0	1148.11	765.406	0	0	0	0	0	0	0	1913.52	0	765.406
X25286-P0M1-P1M9-DR-HDM201-2QW	resistant	6639140	4035615	central_nervous_system	primitive_neuroectodermal_tumour-medulloblastoma	0	0	0	316.423	0	0	0	0	0	0	0	0	0	316.423	0	0	0	0	632.846	474.635	0	0	0	0	0	0	0	0	316.423	9492.69	0	1265.69	0	474.635	20883.9	0	0	0	0	0	0	0	316.423	0
X25459-P0M1-P1M4-DR-HDM201-2QW	resistant	2345609	1893946	central_nervous_system	primitive_neuroectodermal_tumour-medulloblastoma	0	0	0	553.771	0	0	0	0	0	0	0	0	0	0	0	0	0	0	0	0	0	830.656	0	0	0	4430.17	0	0	1107.54	0	0	0	0	0	0	0	0	0	0	0	0	0	0	0
X25459-P0M1-P1M5-DR-HDM201-2QW	resistant	5137098	5644343	central_nervous_system	primitive_neuroectodermal_tumour-medulloblastoma	0	0	0	2388.6	318.479	0	0	0	0	0	0	0	0	0	0	0	0	0	796.199	0	9872.86	318.479	0	0	1910.88	0	0	0	318.479	0	0	0	0	0	0	0	0	0	0	0	0	0	796.199	19905
X25459-P0M1-P1M7-DR-HDM201-2QW	resistant	5132442	4988364	central_nervous_system	primitive_neuroectodermal_tumour-medulloblastoma	0	0	0	0	0	0	0	0	0	0	0	0	0	0	0	0	0	0	435.788	653.681	0	0	0	0	435.788	0	0	0	435.788	0	0	1089.47	0	871.575	435.788	0	0	0	0	0	0	0	5447.35	0
X25459-P0M1-P1M8-DR-HDM201-2QW	resistant	4302447	4477773	central_nervous_system	primitive_neuroectodermal_tumour-medulloblastoma	9177.45	0	0	0	0	0	0	0	0	0	0	0	0	592.094	592.094	0	0	0	2368.38	0	0	0	0	0	0	0	0	0	1480.23	0	0	0	0	0	0	0	0	0	0	0	0	0	2072.33	0
X25459-P0M1-P1M9-DR-HDM201-2QW	resistant	3422744	4015663	central_nervous_system	primitive_neuroectodermal_tumour-medulloblastoma	0	0	0	0	0	0	0	0	0	0	0	0	0	0	1463.49	0	0	0	0	0	0	0	5488.07	0	0	0	0	0	0	0	5488.07	0	0	731.743	0	0	0	0	0	0	0	0	2926.97	0
X25540-P0M1-P1M10-DR-HDM201-2QW	resistant	4766065	3953172	haematopoietic_and_lymphoid_tissue	lymphoid_neoplasm	0	0	0	0	0	0	0	0	1097.55	0	0	0	0	0	0	0	0	156.793	0	156.793	0	0	0	0	313.586	0	0	0	0	0	3214.25	548.775	0	0	6036.53	0	0	0	0	13249	0	0	0	0
X25540-P0M1-P1M11-DR-HDM201-2QW	resistant	3659233	3301871	haematopoietic_and_lymphoid_tissue	lymphoid_neoplasm	0	0	263.478	0	0	0	0	0	395.216	0	0	0	0	0	0	0	0	0	0	263.478	0	0	0	0	526.955	0	263.478	0	0	0	0	0	0	0	1976.08	395.216	1317.39	263.478	0	1449.13	0	0	0	0
X25540-P0M1-P1M4-DR-HDM201-2QW	resistant	3413837	3107648	haematopoietic_and_lymphoid_tissue	lymphoid_neoplasm	0	0	674.532	0	0	0	0	674.532	0	0	0	0	0	0	0	0	0	9555.87	0	1911.17	0	0	449.688	0	0	0	0	0	0	0	0	8544.08	0	0	0	224.844	0	0	5396.26	58796.7	0	562.11	0	0
X25540-P0M1-P1M5-DR-HDM201-2QW	resistant	3474036	3003021	haematopoietic_and_lymphoid_tissue	lymphoid_neoplasm	0	0	11224.7	510.213	0	0	0	0	0	0	0	0	14388	0	0	0	204.085	0	0	0	0	0	0	0	13571.7	0	0	0	0	0	0	0	0	0	0	0	0	0	0	9183.84	0	1326.55	0	0
X25540-P0M1-P1M6-DR-HDM201-2QW	resistant	3812420	4132201	haematopoietic_and_lymphoid_tissue	lymphoid_neoplasm	0	0	878.05	0	0	34403.6	0	8620.86	0	0	0	0	0	0	0	0	10456.8	0	0	478.937	0	0	0	0	159.646	0	0	0	0	0	0	239.468	0	0	558.759	2554.33	0	0	0	15884.7	0	0	0	0
X25540-P0M1-P1M7-DR-HDM201-2QW	resistant	3585403	3796062	haematopoietic_and_lymphoid_tissue	lymphoid_neoplasm	332.02	166.01	0	0	0	1411.09	0	0	0	0	0	0	0	166.01	0	0	0	0	0	4233.26	0	249.015	0	0	581.035	8798.53	0	0	0	0	0	415.025	0	0	11371.7	14857.9	0	0	0	38182.3	0	0	0	0
X25540-P0M1-P1M8_1-DR-HDM201-2QW	resistant	2824718	2566756	haematopoietic_and_lymphoid_tissue	lymphoid_neoplasm	0	0	0	0	1816.73	0	0	0	227.091	0	0	0	0	0	0	0	0	0	0	0	0	0	0	0	0	0	0	0	0	227.091	0	4541.82	0	0	0	0	0	0	0	9197.18	0	454.182	0	0
X25540-P0M1-P1M8_2-DR-HDM201-2QW	resistant	2856380	2596922	haematopoietic_and_lymphoid_tissue	lymphoid_neoplasm	0	0	0	0	0	0	0	0	405.175	0	0	0	0	0	0	0	0	0	0	0	0	0	0	0	0	0	0	0	0	0	0	0	0	0	0	0	0	0	0	810.349	0	0	675.291	0
X25540-P0M1-P1M9-DR-HDM201-2QW	resistant	3075337	2373105	haematopoietic_and_lymphoid_tissue	lymphoid_neoplasm	0	0	0	0	0	0	0	0	0	0	0	0	0	0	0	348.3	0	0	0	29373.3	0	0	0	0	0	0	0	0	0	0	0	232.2	0	0	0	464.4	0	0	0	56772.9	0	0	0	0
X25625-P0M1-P1M4-DR-HDM201-2QW	resistant	6516051	7326711	central_nervous_system	primitive_neuroectodermal_tumour-medulloblastoma	0	0	0	343.375	0	0	0	0	572.291	228.917	0	0	0	572.291	228.917	0	0	0	0	0	0	0	801.208	0	5036.16	0	0	0	1716.87	0	0	5379.54	0	0	0	0	0	0	0	0	572.291	228.917	0	0
X25625-P0M1-P1M5-DR-HDM201-2QW	resistant	7818312	7341536	central_nervous_system	primitive_neuroectodermal_tumour-medulloblastoma	0	0	175.442	263.163	0	0	0	0	0	0	0	175.442	0	0	3245.68	0	0	0	0	175.442	0	350.884	350.884	0	4298.33	614.047	0	0	964.932	0	175.442	526.326	263.163	0	0	0	0	0	0	0	789.49	0	0	0
X25625-P0M1-P1M6-DR-HDM201-2QW	resistant	7455647	8602286	central_nervous_system	primitive_neuroectodermal_tumour-medulloblastoma	0	0	0	0	333.56	0	333.56	0	1556.61	4113.91	0	0	0	1556.61	2223.73	0	0	0	222.373	0	222.373	0	1334.24	0	1556.61	0	0	0	0	0	0	667.12	0	2779.67	0	0	0	0	0	0	1223.05	0	4781.03	0
X25625-P0M1-P1M7-DR-HDM201-2QW	resistant	8983041	9627511	central_nervous_system	primitive_neuroectodermal_tumour-medulloblastoma	0	0	0	0	3076.99	0	0	0	0	4230.86	0	0	0	0	1250.03	0	0	0	0	0	0	0	1153.87	0	5288.58	0	0	0	0	0	192.312	16635	0	673.092	0	0	0	480.78	0	0	769.248	0	576.936	0
X25625-P0M1-P1M8-DR-HDM201-2QW	resistant	7216627	8615295	central_nervous_system	primitive_neuroectodermal_tumour-medulloblastoma	0	1323.5	0	220.583	0	0	0	0	220.583	0	0	0	0	0	3198.45	0	0	0	0	0	0	330.874	220.583	0	4301.36	0	0	0	1874.95	0	0	2867.57	772.039	1213.2	0	0	0	0	0	0	1102.91	0	1102.91	992.621
X25665-P0M1-P1M4-DR-HDM201-2QW	resistant	3772035	2955730	haematopoietic_and_lymphoid_tissue	lymphoid_neoplasm	0	0	0	231.61	0	0	0	0	0	231.61	0	0	0	11464.7	0	579.026	0	0	0	0	0	0	0	0	0	347.415	0	0	231.61	0	0	0	0	0	0	0	0	0	579.026	231.61	0	579.026	0	0
X25665-P0M1-P1M5-DR-HDM201-2QW	resistant	4019244	3481183	haematopoietic_and_lymphoid_tissue	lymphoid_neoplasm	0	0	0	6661.61	0	0	0	0	0	0	0	0	0	17881.2	0	0	0	0	0	0	0	0	0	0	175.306	0	19984.8	0	0	0	0	262.958	175.306	0	438.264	0	0	0	0	0	0	4032.03	0	0
X25665-P0M1-P1M6-DR-HDM201-2QW	resistant	2340111	2013923	haematopoietic_and_lymphoid_tissue	lymphoid_neoplasm	0	0	0	0	0	262.977	0	0	0	0	0	0	0	262.977	0	0	0	0	0	10387.6	0	0	0	0	1183.4	0	0	0	0	0	0	0	0	0	0	0	0	0	0	0	0	788.932	0	0
X25665-P0M1-P1M7-DR-HDM201-2QW	resistant	3199181	2646151	haematopoietic_and_lymphoid_tissue	lymphoid_neoplasm	0	0	0	0	0	0	0	0	0	0	0	0	0	279.03	0	0	0	0	0	0	0	0	0	0	0	0	1255.64	15625.7	0	0	0	0	21764.4	0	0	0	0	0	0	0	0	0	279.03	0
X25665-P0M1-P1M8-DR-HDM201-2QW	resistant	3681275	3631905	haematopoietic_and_lymphoid_tissue	lymphoid_neoplasm	0	0	0	0	0	0	521.777	0	0	0	0	0	0	0	0	521.777	0	173.926	0	260.889	0	0	0	0	347.852	0	0	0	0	0	0	347.852	3043.7	0	0	347.852	10261.6	0	0	0	0	782.666	173.926	0
X25665-P0M1-P1M9-DR-HDM201-2QW	resistant	3783941	3144643	haematopoietic_and_lymphoid_tissue	lymphoid_neoplasm	0	0	0	0	0	0	0	0	0	0	0	0	1939.93	0	0	0	0	0	0	0	0	0	0	0	0	228.228	0	0	912.911	0	228.228	0	0	0	0	228.228	0	0	0	0	0	0	1369.37	0
X25272-P0M1-P1M14-VEH	untreated	5675875	10654088	central_nervous_system	primitive_neuroectodermal_tumour-medulloblastoma	0	0	0	359.912	0	0	0	0	0	0	0	0	0	0	5038.77	0	0	0	359.912	359.912	0	4678.86	0	2159.47	1079.74	359.912	0	0	1079.74	0	0	899.781	0	7738.11	0	0	0	0	0	0	0	0	8637.9	539.868
X25272-P0M1-P1M15-VEH	untreated	2271210	5642926	central_nervous_system	primitive_neuroectodermal_tumour-medulloblastoma	0	0	0	1108.19	0	0	0	0	1292.89	0	0	0	0	0	12744.2	0	0	0	0	0	0	0	0	0	923.496	0	0	0	1477.59	0	1108.19	0	0	2401.09	4248.08	0	0	0	0	0	0	369.398	369.398	0
X25272-P0M1-P1M1-VEH	untreated	8072898	8100124	central_nervous_system	primitive_neuroectodermal_tumour-medulloblastoma	0	0	0	2121.32	0	0	0	0	0	0	0	0	0	0	282.843	0	424.264	0	0	0	0	707.107	1272.79	0	989.95	0	0	0	17394.8	0	0	1272.79	0	707.107	0	0	0	0	0	0	424.264	0	2687.01	282.843
X25272-P0M1-P1M2-VEH	untreated	4107191	5126689	central_nervous_system	primitive_neuroectodermal_tumour-medulloblastoma	0	0	0	0	0	687.361	0	0	0	458.241	0	0	0	1603.84	0	0	0	0	0	0	0	0	0	0	0	0	0	0	687.361	0	0	458.241	0	0	0	0	0	0	0	0	0	916.482	916.482	0
X25272-P0M1-P1M3-VEH	untreated	7981223	8456785	central_nervous_system	primitive_neuroectodermal_tumour-medulloblastoma	0	0	0	536.371	0	0	0	0	0	10727.4	0	0	0	0	30573.2	0	0	0	0	0	0	0	31645.9	804.557	0	0	0	0	536.371	0	0	536.371	0	536.371	0	0	0	0	0	0	0	0	804.557	0
X25286-P0M1-P1M14-VEH	untreated	7603134	3333838	central_nervous_system	primitive_neuroectodermal_tumour-medulloblastoma	0	0	0	0	0	0	0	0	3554.33	0	0	0	0	0	0	0	0	0	1672.63	0	0	627.235	627.235	0	1254.47	0	418.157	0	627.235	2090.78	0	836.314	0	627.235	0	0	0	0	0	0	0	0	0	0
X25286-P0M1-P1M15-VEH	untreated	5144233	3641621	central_nervous_system	primitive_neuroectodermal_tumour-medulloblastoma	0	0	0	0	0	458.231	0	0	305.487	305.487	0	0	0	0	305.487	0	305.487	916.462	0	0	0	305.487	0	0	1527.44	458.231	0	0	2596.64	6567.98	916.462	610.975	610.975	0	305.487	0	0	0	0	0	0	0	1680.18	0
X25286-P0M1-P1M1-VEH	untreated	5155882	5099251	central_nervous_system	primitive_neuroectodermal_tumour-medulloblastoma	0	0	0	2478.56	0	0	0	0	0	0	7435.67	0	0	0	0	2148.08	0	0	330.474	0	0	0	0	0	2974.27	0	826.185	0	991.422	1321.9	0	0	0	2974.27	826.185	330.474	0	0	0	0	0	330.474	0	330.474
X25286-P0M1-P1M2-VEH	untreated	3393796	6767288	central_nervous_system	primitive_neuroectodermal_tumour-medulloblastoma	0	0	0	470.42	0	0	0	0	0	0	0	0	0	940.839	0	0	0	0	627.226	0	0	0	313.613	0	313.613	940.839	470.42	784.033	627.226	11917.3	0	13955.8	0	1097.65	1097.65	0	0	0	0	0	0	0	2665.71	313.613
X25286-P0M1-P1M3-VEH	untreated	4807856	6276613	central_nervous_system	primitive_neuroectodermal_tumour-medulloblastoma	0	20248.8	0	0	0	0	0	0	1584.69	0	0	0	0	0	352.154	0	0	0	1056.46	0	0	0	0	0	2993.31	0	1584.69	0	9860.3	0	0	0	0	0	0	0	0	0	0	0	0	528.23	352.154	0
X25459-P0M1-P1M14-VEH	untreated	3027938	4023863	central_nervous_system	primitive_neuroectodermal_tumour-medulloblastoma	0	0	988.656	0	0	0	0	0	0	0	0	0	0	0	659.104	0	0	0	0	0	0	659.104	0	0	0	659.104	0	0	9886.56	0	0	2636.42	0	0	0	0	0	0	0	0	0	0	0	0
X25459-P0M1-P1M15-VEH	untreated	4744008	6392715	central_nervous_system	primitive_neuroectodermal_tumour-medulloblastoma	0	0	0	0	0	0	0	0	0	0	0	0	0	0	0	0	0	0	0	0	0	0	0	0	650.592	0	0	0	1301.18	0	7807.1	1301.18	0	650.592	0	0	0	0	0	0	0	0	0	0
X25459-P0M1-P1M1-VEH	untreated	2919105	3098056	central_nervous_system	primitive_neuroectodermal_tumour-medulloblastoma	0	0	0	0	0	0	0	637.748	0	0	0	0	0	0	0	0	0	0	637.748	0	0	0	0	0	0	0	0	0	0	0	637.748	0	0	0	0	0	0	0	0	0	0	2232.12	0	0
X25459-P0M1-P1M2-VEH	untreated	3453742	3825287	central_nervous_system	primitive_neuroectodermal_tumour-medulloblastoma	0	0	0	1222.76	0	0	0	0	0	0	0	489.103	0	733.655	2934.62	0	0	4401.93	489.103	733.655	0	0	0	0	0	0	0	0	0	0	0	2690.07	0	0	0	0	1956.41	0	0	0	0	0	978.207	0
X25459-P0M1-P1M3-VEH	untreated	2596802	2061975	central_nervous_system	primitive_neuroectodermal_tumour-medulloblastoma	0	0	0	0	0	0	0	0	0	0	0	0	0	0	2176.6	0	0	0	816.225	0	544.15	0	0	0	544.15	0	0	0	2448.68	0	0	544.15	0	0	0	0	0	0	0	0	0	0	1632.45	5713.58
X25540-P0M1-P1M14-VEH	untreated	2311038	2584493	haematopoietic_and_lymphoid_tissue	lymphoid_neoplasm	0	369.562	0	0	0	246.375	246.375	0	0	0	0	0	0	0	0	0	0	246.375	0	862.312	0	0	0	0	0	0	0	0	0	0	0	0	0	0	0	492.75	0	0	0	26978.1	0	246.375	0	0
X25540-P0M1-P1M15-VEH	untreated	7199601	7394530	haematopoietic_and_lymphoid_tissue	lymphoid_neoplasm	0	0	0	0	0	1821.87	0	0	173.511	0	0	0	0	0	0	0	0	0	0	347.022	0	433.778	694.044	0	260.267	0	0	0	0	0	0	2255.64	0	173.511	0	954.311	0	0	0	59254	0	12666.3	0	0
X25540-P0M1-P1M1-VEH	untreated	3983814	3615757	haematopoietic_and_lymphoid_tissue	lymphoid_neoplasm	0	0	0	0	0	199.198	0	0	398.397	0	0	199.198	0	0	0	0	0	0	0	199.198	0	0	0	0	36752.1	0	0	0	398.397	0	0	995.991	0	0	4282.76	199.198	199.198	0	0	77388.5	0	0	9063.52	0
X25540-P0M1-P1M2-VEH	untreated	3432082	3132411	haematopoietic_and_lymphoid_tissue	lymphoid_neoplasm	0	0	0	0	0	0	0	0	0	0	0	734.803	0	367.401	0	0	0	0	0	612.336	0	0	0	0	0	0	0	0	0	0	0	0	489.868	0	1714.54	0	0	0	1102.2	53273.2	0	489.868	0	0
X25625-P0M1-P1M14-VEH	untreated	5058222	3987877	central_nervous_system	primitive_neuroectodermal_tumour-medulloblastoma	0	0	0	0	10986.6	0	0	0	0	0	0	0	0	0	732.442	0	0	0	732.442	0	0	0	0	292.977	585.953	0	0	0	4248.16	0	1171.91	732.442	292.977	0	0	0	0	0	0	0	1611.37	585.953	292.977	0
X25625-P0M1-P1M15-VEH	untreated	6155416	6547861	central_nervous_system	primitive_neuroectodermal_tumour-medulloblastoma	0	0	0	0	0	0	0	424.314	707.19	424.314	0	0	0	0	282.876	0	0	282.876	282.876	0	0	282.876	424.314	0	10749.3	0	0	0	282.876	0	0	707.19	0	707.19	0	424.314	0	0	0	0	2545.88	282.876	1272.94	0
X25625-P0M1-P1M1-VEH	untreated	4355064	5284701	central_nervous_system	primitive_neuroectodermal_tumour-medulloblastoma	0	0	0	445.351	0	0	0	0	0	0	0	0	0	0	0	0	0	0	0	0	0	0	0	0	0	0	0	0	0	0	0	1781.41	0	0	0	0	0	0	0	0	90629	0	0	0
X25625-P0M1-P1M2-VEH	untreated	4295493	4900369	central_nervous_system	primitive_neuroectodermal_tumour-medulloblastoma	0	0	0	0	0	0	0	0	0	0	0	0	0	0	0	0	0	0	0	333.149	0	832.871	0	0	1166.02	0	333.149	0	333.149	0	0	1665.74	0	0	0	0	0	0	0	0	14325.4	0	0	0
X25625-P0M1-P1M3-VEH	untreated	6272649	6917518	central_nervous_system	primitive_neuroectodermal_tumour-medulloblastoma	0	0	0	391.338	0	0	0	0	0	0	0	0	0	0	6391.85	260.892	0	0	0	0	0	0	18392.9	0	260.892	0	0	0	260.892	0	913.121	391.338	0	0	0	0	0	10044.3	0	0	2087.13	0	1043.57	0
X25665-P0M1-P1M14-VEH	untreated	3208256	2801703	haematopoietic_and_lymphoid_tissue	lymphoid_neoplasm	0	380.389	0	0	0	0	0	0	0	285.292	0	285.292	380.389	0	0	0	0	0	0	0	0	570.584	0	0	0	285.292	8368.57	0	1426.46	0	0	2757.82	1331.36	0	190.195	570.584	0	0	0	0	0	285.292	1236.27	190.195
X25665-P0M1-P1M15-VEH	untreated	1396960	1948989	haematopoietic_and_lymphoid_tissue	lymphoid_neoplasm	0	765.122	286.921	0	0	191.28	0	0	0	0	0	0	0	860.762	0	0	0	0	0	0	0	0	0	0	0	0	478.201	191.28	0	0	1147.68	1338.96	0	0	0	0	191.28	0	0	0	0	1147.68	191.28	1530.24
X25665-P0M1-P1M1-VEH	untreated	4200224	3718524	haematopoietic_and_lymphoid_tissue	lymphoid_neoplasm	0	0	217.125	0	0	0	0	0	0	0	0	0	217.125	0	0	217.125	0	0	325.688	977.064	0	0	0	0	759.939	0	0	0	0	759.939	0	2171.25	0	0	0	0	0	0	0	0	0	217.125	2388.38	0
X25665-P0M1-P1M2-VEH	untreated	3987629	3152064	haematopoietic_and_lymphoid_tissue	lymphoid_neoplasm	0	0	0	0	0	0	0	0	1239.29	0	0	0	206.549	206.549	0	0	0	0	0	0	0	0	0	206.549	0	0	41722.8	0	0	0	0	826.195	0	0	0	413.097	826.195	0	206.549	0	0	516.372	619.646	0
X25665-P0M1-P1M3-VEH	untreated	4117648	3273528	haematopoietic_and_lymphoid_tissue	lymphoid_neoplasm	0	193.479	193.479	0	0	0	193.479	0	1741.31	0	0	193.479	0	677.177	0	193.479	0	0	0	0	0	0	0	0	773.917	0	870.656	0	580.438	1547.83	0	386.958	0	0	0	0	0	0	386.958	0	0	0	483.698	193.479
[truncated: 1,911 more columns]

## Sheet: D-2QW Dosing - genes
gene_name	Fold change	PValue	FDR	AvgDiv	PercentSample	predicted_function
Trp53	216.362	3.57195e-55	1.92528e-51	31068.4	0.701493	Uncertain
Bcl2l1	102.91	1.82153e-47	4.90902e-44	9651.41	0.626866	GOF
Mdm4	87.0787	2.32509e-34	4.17741e-31	12252.4	0.38806	GOF		FC>5 is listed
Bcas3	14.5282	8.12464e-16	1.0948e-12	1774.53	0.238806	LOF
Trp73	12.15	3.36382e-10	2.01456e-07	4789.23	0.223881	GOF
Trp63	9.04537	1.19131e-09	6.29026e-07	1973.07	0.313433	GOF
Nrxn3	8.005	2.63865e-12	1.77779e-09	4326.49	0.731343	Uncertain
Irs1	7.30443	1.53886e-09	6.91204e-07	4361.57	0.507463	Uncertain
Enox1	6.72351	2.95796e-08	1.00663e-05	2314.32	0.38806	LOF
Znrf2	6.07448	7.23718e-07	0.000134512	1191.01	0.283582	GOF
Zfp217	6.02256	2.98815e-08	1.00663e-05	14004.9	0.537313	GOF
Lrp6	6.02114	3.39598e-06	0.000496065	1995.45	0.164179	GOF
Rnf219	5.92935	2.20794e-06	0.000340023	1277.16	0.149254	Uncertain
Ncam1	5.71568	3.6869e-07	8.07092e-05	1033.06	0.328358	Uncertain
Inpp5k	5.711	1.20046e-05	0.00126873	1262.28	0.0746269	LOF
Akt2	5.70034	1.28479e-06	0.000216407	721.544	0.134328	GOF
Cog7	5.52368	7.62972e-08	2.05621e-05	3871.83	0.537313	GOF
St18	5.50884	1.9977e-07	4.89436e-05	4021.01	0.477612	LOF
Ahdc1	5.49958	6.85917e-07	0.000132039	2911.78	0.358209	LOF
Crebbp	5.38908	1.1032e-08	4.24731e-06	42431.5	0.880597	GOF
Srrm4	5.18143	1.01682e-06	0.000176795	2743.93	0.283582	LOF
